# Supplementary material for: Hybrid porous polymers constructed from octavinylsilsesquioxane and benzene via Friedel–Crafts reaction: tunable porosity, gas sorption, and postfunctionalization
Source: Royal Society of Chemistry journal article supplement (doi:10.1039/c3ta14746k), 2013-11-29
Supplement: c3ta14746k.pdf [file c3ta14746k.pdf]

# Hybrid Porous Polymers Constructed from Octavinylsilsesquioxane and Benzene via Friedel–Crafts Reaction: Tunable Porosity, Gas Sorption, and Postfunctionalization

Yue Wu,<sup>[a,b]</sup> Dengxu Wang,<sup>[a]</sup> Liguang Li,<sup>[a]</sup> Wenyan Yang,<sup>[a]</sup> Shengyu Feng,<sup>\*[a]</sup> and  
Hongzhi Liu<sup>\*[a]</sup>

<sup>[a]</sup> Key Laboratory of Special Functional Aggregated Materials, Ministry of Education, School of Chemistry and Chemical Engineering, Shandong University, Jinan 250100, P. R. China

<sup>[b]</sup> Key Laboratory of Fine Chemicals in Universities of Shandong, Shandong Polytechnic University, Jinan 250353, P. R. China

Figure S1. FT-IR spectra of OVS and HPP-1 to HPP-4

Figure S2 FE-SEM image of HPP-2

Figure S3 FE-SEM image of HPP-3

Figure S4 FE-SEM image of HPP-4,

Figure S5 HRTEM image of HPP-2.

Figure S6 HRTEM image of HPP-3.

Figure S7 HRTEM image of HPP-4.

Figure S8. FT-IR spectra of HPP-4 (a) and HPP-4 postfunctionalized with 3-mercaptopropionic acid (b)

Figure S9. <sup>13</sup>C CP/MAS NMR of HPP-4 (a) and HPP-4 postfunctionalized with 3-mercaptopropionic acid (b)

Figure S10. <sup>29</sup>Si MAS NMR of HPP-4 (a) and HPP-4 postfunctionalized with 3-mercaptopropionic acid (b)

Figure S11. The nitrogen isotherm of HPP-4 postfunctionalized with 3-mercaptopropionic acid

Figure S12. NL-DFT PDS of HPP-4 (a) and HPP-4 postfunctionalized with

---

\* Corresponding Authors. E-mail: liuhongzhi@sdu.edu.cn

3-mercaptopropionic acid (b)

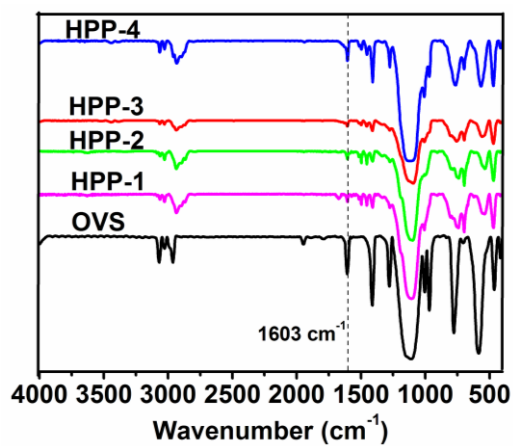

Figure S1. FT-IR spectra of OVS and HPP-1 to HPP-4

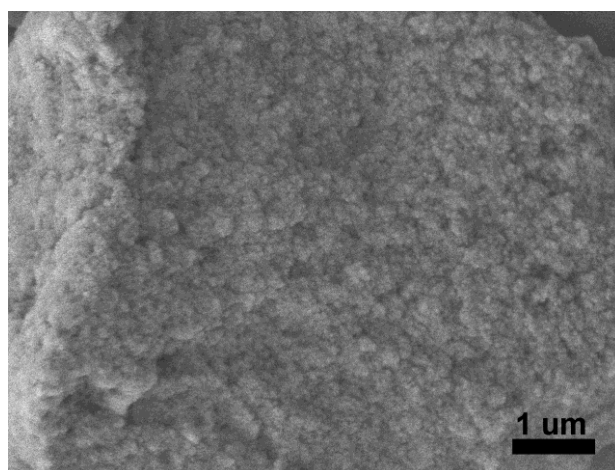

Figure S2. FE-SEM image of HPP-2

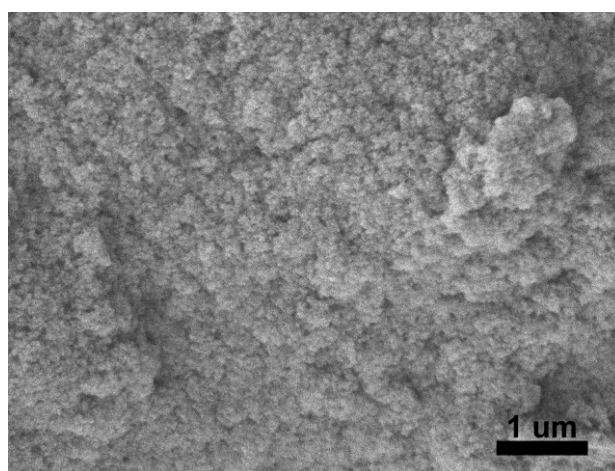

Figure S3. FE-SEM image of HPP-3

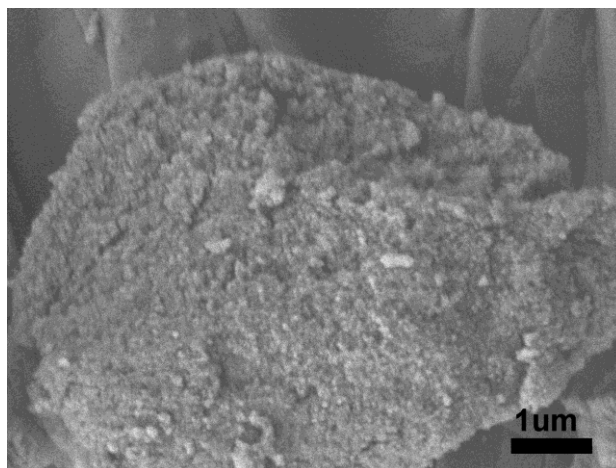

Figure S4. FE-SEM image of HPP-4

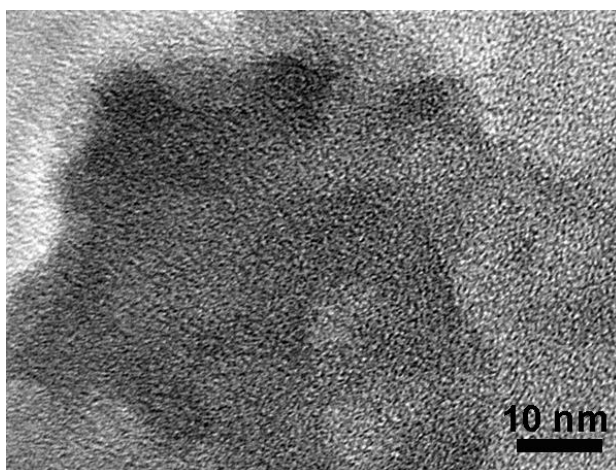

Figure S5. HRTEM image of HPP-2.

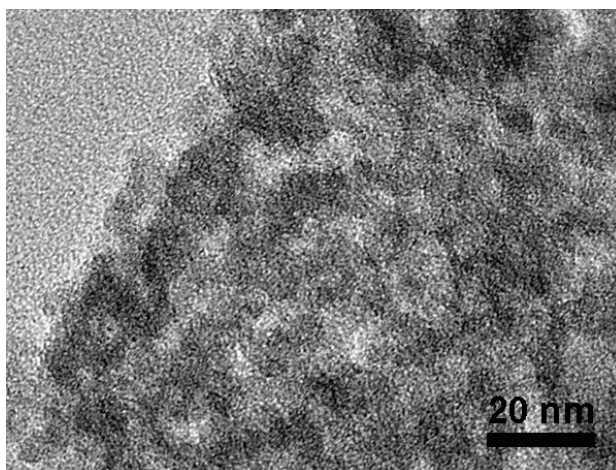

Figure S6. HRTEM image of HPP-3.

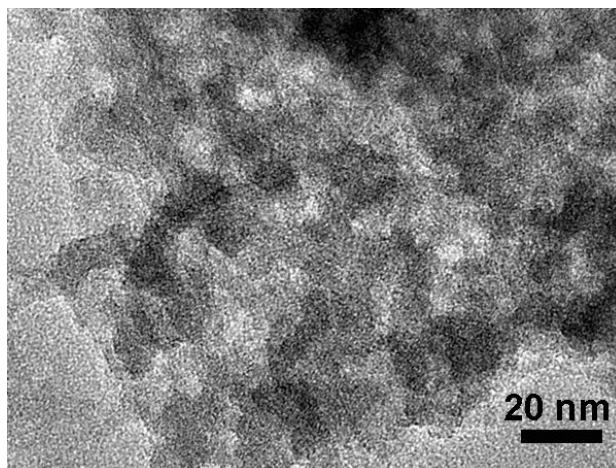

Figure S7. HRTEM image of HPP-4.

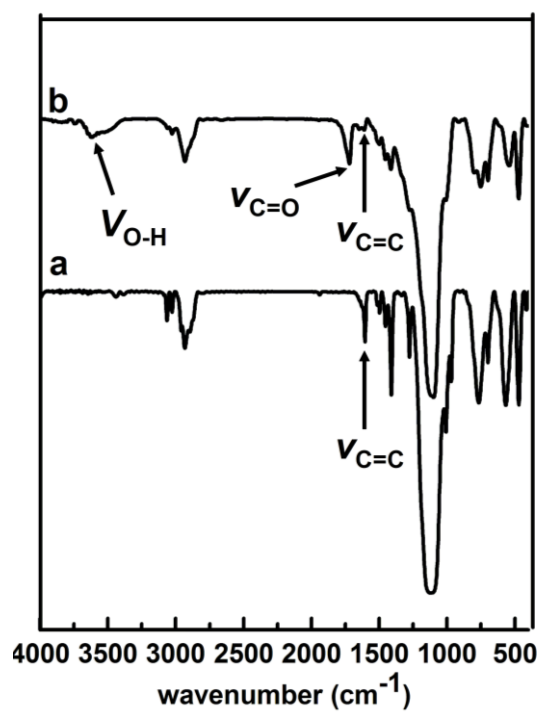

Figure S8. FT-IR spectra of HPP-4 (a) and HPP-4 postfunctionalized with 3-mercaptopropionic acid (b)

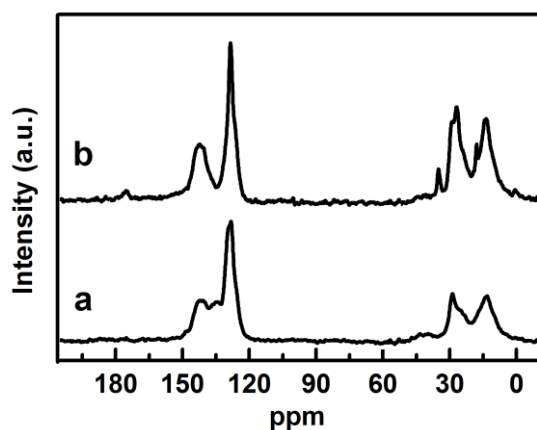

Figure S9.  $^{13}\text{C}$  CP/MAS NMR of HPP-4 (a) and HPP-4 postfunctionalized with 3-mercaptopropionic acid (b)

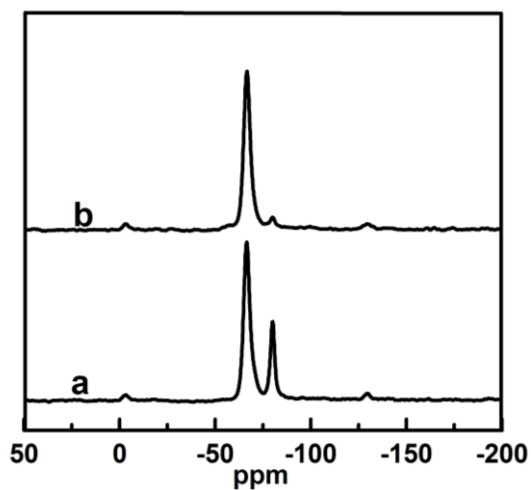

Figure S10.  $^{29}\text{Si}$  MAS NMR of HPP-4 (a) and HPP-4 postfunctionalized with 3-mercaptopropionic acid (b)

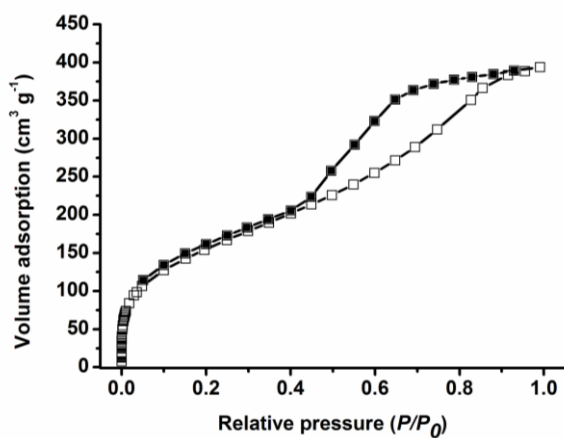

Figure S11. The nitrogen isotherm of HPP-4 postfunctionalized with 3-mercaptopropionic acid

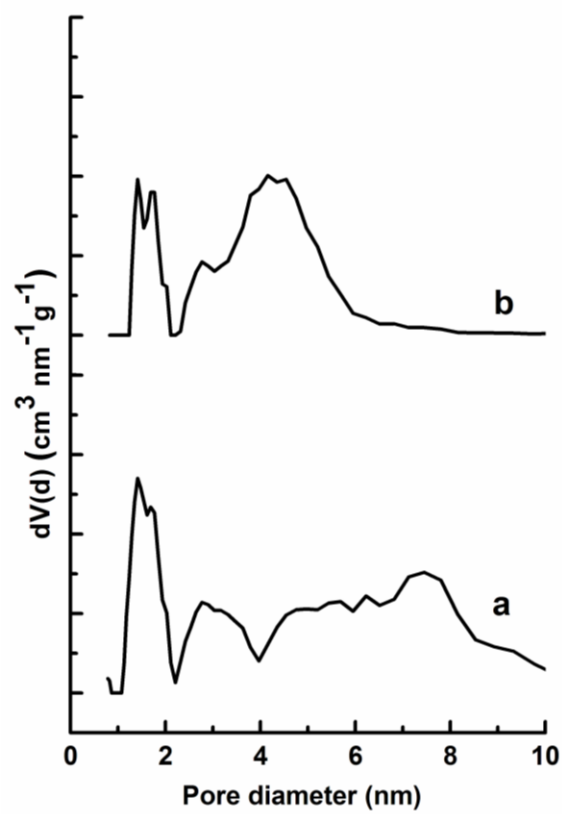

Figure S12. NL-DFT PDS of HPP-4 (a) and HPP-4 postfunctionalized with 3-mercaptopropionic acid (b)
